# Supplementary material for: A survey-based analysis of the academic job market
Source: eLife. 2020 Jun 12;9:e54097. doi: 10.7554/eLife.54097 (PMC7360372; doi:10.7554/eLife.54097)
Supplement: Supplementary file 1. — Resources for finding academic jobs, often mentioned by our applicant survey respondents and cited by others as helpful for locating academic job announcements across different fields. [file elife-54097-supp1.xlsx]

## Sheet: Sheet1
Table S1. Common online resources for finding academic jobs
General job search	Functionality
https://academicjobsonline.org/ajo	Can search by discipline & location
https://jobs.sciencecareers.org/	Jobs in Science & Technology from Science Careers
https://www.indeed.com/	General job search from Indeed.com
https://www.higheredjobs.com/	Higher Education Job search by Institution, job type, by category, school & location
https://www.hercjobs.org/	Higher Education jobs by state & job type
https://academicpositions.com/	Academic job search by employer
https://www.timeshighereducation.com/unijobs/en-us/	Academic job search by keyword & location
https://chroniclevitae.com/	Higher Education Job search by location, institution type, & field/keywords
https://www.interfolio.com/	Interfolio Faculty Search is a faculty hiring platform, covering every detail of the recruitment process, from confidential letters to 100% compliance on EEO forms.
Field-specific job search	Functionality
https://jobs.ascb.org/	Cell Biology jobs
http://psychjobsearch.wikidot.com/	Psychology jobs
http://neurorumblr.com/	Neuroscience jobs
http://chemjobber.blogspot.com/	Chemistry jobs
http://ecoevojobs.net	Ecology & Evolution Biology jobs
