# Supplementary material for: A survey-based analysis of the academic job market
Source: eLife. 2020 Jun 12;9:e54097. doi: 10.7554/eLife.54097 (PMC7360372; doi:10.7554/eLife.54097)
Supplement: Supplementary file 2. — Overview of job application survey respondents’ (total and by gender) field of study. Fields which had fewer than three respondents in our job applicant survey were aggregated as “Other Fields” in the table. All percentages are calculated out of the total number of respondents. [file elife-54097-supp2.xlsx]

## Sheet: Sheet1
Table S2. Applicants by their Field of Research & Gender
Field	Theme	Total Applicant number	Female Applicant number	Male Applicant number	Non-Binary/did not disclose gender
		(total n=317)	(total n=153)	(total n=160)	(total n=4)
	Total Number of respondents to this question	1	0.483	0.505	0
		(317 out of 317)	(153 out of 317)	(160 out of 317)	(0 out of 4)
Life Sciences	Biomedical Sciences	0.524	0.542	0.506	0.5
		(166 out of 317)	(83 out of 153)	(81 out of 160)	(2 out of 4)
	Biology (other)	0.196	0.235	0.163	0.25
		(62 out of 317)	(36 out of 153)	(26 out of 160)	(1 out of 4)
	Chemistry	0.088	0.059	0.119	0
		(28 out of 317)	(9 out of 153)	(19 out of 160)	(0 out of 4)
	Bioengineering	0.038	0.026	0.05	0
		(12 out of 317)	(4 out of 153)	(8 out of 160)	(0 out of 4)
Other Fields	Earth Sciences	0.025	0.033	0.013	0.25
		(8 out of 317)	(5 out of 153)	(2 out of 160)	(1 out of 4)
	Physics	0.022	0.013	0.031	0
		(7 out of 317)	(2 out of 153)	(5 out of 160)	(0 out of 4)
	Chemical Engineering	0.022	0.02	0.025	0
		(7 out of 317)	(3 out of 153)	(4 out of 160)	(0 out of 4)
	Psychology	0.022	0.02	0.025	0
		(7 out of 317)	(3 out of 153)	(4 out of 160)	(0 out of 4)
	Engineering	0.019	0.013	0.025	0
		(6 out of 317)	(2 out of 153)	(4 out of 160)	(0 out of 4)
	Social Sciences	0.013	0.026	0	0
		(4 out of 317)	(4 out of 153)	(0 out of 160)	(0 out of 4)
	Computer Sciences	0.013	0.013	0.013	0
		(4 out of 317)	(2 out of 153)	(2 out of 160)	(0 out of 4)
	Health Sciences + Cognitive Sciences + Materials Science + Mathematics	0.019	Less than 1%	0.031	0
		(6 out of 317)	(1 out of 153)	(5 out of 160)	(0 out of 4)
