# Supplementary material for: A survey-based analysis of the academic job market
Source: eLife. 2020 Jun 12;9:e54097. doi: 10.7554/eLife.54097 (PMC7360372; doi:10.7554/eLife.54097)
Supplement: Supplementary file 3. — Overview of candidates’ country of research origin. Regions which had fewer than five respondents in our job applicant survey were aggregated as “Other countries” in the table. All percentages are calculated out of the total number of respondents to this particular survey question (297) not the total number of overall survey respondents (n = 317). [file elife-54097-supp3.xlsx]

## Sheet: Sheet1
Table S3. Applicant Demographics: Country of Research Origin (Applicant Location)
Applicant Origin (country in which the applicant conducted research while applying for a faculty position)	Number of Applicants
United States	72% (214 out of 297)
Canada	10.1% (30 out of 297)
United Kingdom	9.1% (27 out of 297)
Germany	2.4% (7 out of 297)
France	1.7% (5 out of 297)
Other countries: Spain + Sweden + India + Norway + Singapore	4.7 % (14 out of 297)
+ Japan + The Netherlands + Switzerland
Number of applicants who indicated country of research origin	93.7% (297 out of 317)
(not blank)
Did not respond to this survey Question	6.3% (20 out of 317)
