# Supplementary material for: A survey-based analysis of the academic job market
Source: eLife. 2020 Jun 12;9:e54097. doi: 10.7554/eLife.54097 (PMC7360372; doi:10.7554/eLife.54097)
Supplement: Supplementary file 4. — Overview of the countries to which the faculty candidates applied to, for faculty positions. Note: most candidates applied to more than one country. Regions which had fewer than five respondents in our job applicant survey were aggregated as “Other countries and regions” in the table. All percentages are calculated out of the total number of respondents to this particular survey question (n = 317). [file elife-54097-supp4.xlsx]

## Sheet: Sheet1
Table S4. Country to which faculty application was made (Job Location)
Application destination	Number of Applicant
(country to which the applicants applied for a faculty position)
United states	81.7% (259 out of 317)
Canada	33.1% (105 out of 317)
United Kingdom	24.3% (77 out of 317)
Germany	10.4% (33 out of 317)
France	7.8% (24 out of 317)
Switzerland	7.8% (24 out of 317)
Australia	5 % (16 out of 317)
The Netherlands	4.1% (13 out of 317)
Austria	4.1% (13 out of 317)
