# Supplementary material for: A survey-based analysis of the academic job market
Source: eLife. 2020 Jun 12;9:e54097. doi: 10.7554/eLife.54097 (PMC7360372; doi:10.7554/eLife.54097)
Supplement: Supplementary file 5. — Overview of current academic position of our job applicant survey respondents. All percentages are calculated out of the total number of respondents to this particular survey question (n = 317). [file elife-54097-supp5.xlsx]

## Sheet: Sheet1
Table S5. Applicants’ current research/academic position
Theme	Applicant number (n=317)
Postdoctoral Researcher	96% (304 out of 317)
Doctoral researcher (PhD)	less than 1% (2 out of 317)
Principal Investigator (PI)	1.3 % (4 out of 317)
Other Research Position	2.2% (7 out of 317)
Did not respond to this survey Question	0% (0 out of 317)
