# Supplementary material for: A survey-based analysis of the academic job market
Source: eLife. 2020 Jun 12;9:e54097. doi: 10.7554/eLife.54097 (PMC7360372; doi:10.7554/eLife.54097)
Supplement: Supplementary file 6. — Overview of time spent in postdoctoral training by our job applicant survey respondents. [file elife-54097-supp6.xlsx]

## Sheet: Sheet1
Table S6. Applicants’ Postdoctoral training time statistics
Theme	Postdoctoral Training (in years)
Time spent in postdoctoral training by all	Average = 4.35 years;
	Median = 4 years
Time spent in postdoctoral training by	Average = 4.39 years;
Male candidates	Median = 5 years
Time spent in postdoctoral training by	Average = 4.20 years;
Female candidates	Median = 4 years
Minimum time spent in postdoctoral training by any candidates	1 year
Maximum time spent in postdoctoral training by any candidates	13 years
