# Supplementary material for: A survey-based analysis of the academic job market
Source: eLife. 2020 Jun 12;9:e54097. doi: 10.7554/eLife.54097 (PMC7360372; doi:10.7554/eLife.54097)
Supplement: Supplementary file 7. — Summary of statistical analysis. In this table and relevant figures, “ns” stands for not significant. [file elife-54097-supp7.xlsx]

## Sheet: Sheet1
Table S7. Summary of the Statistical Analysis in this paper
Context	p-value	Statistical test used	Corresponding section, Figure & Table
Demographics of our applicant survey respondents: years of postdoctoral training	Life sciences vs Other fields	Two-tailed Wilcoxon rank sum test	Results,
	p-value=6.50 x 10-6,		Figure 1D,
			Table S6
	Years as Postdoc Male vs Female Applicants
	p-value=0.2(ns)
Number of applicant first-author papers by gender	p-value=1.40 x 10-4	Two-tailed Wilcoxon rank sum test	Results,
			Figure 2B,
			Table S9
Total Publications by gender	p-value=3.0 x 10-3	Two-tailed Wilcoxon rank sum test	Results,
			Figure 2B,
			Table S9
All Citations by gender	p-value=1.5 x 10-2	Two-tailed Wilcoxon rank sum test	Results,
			Figure 2B,
			Table S9
Applicant h-index by gender	p-value=5.4 x 10-3	Two-tailed Wilcoxon rank sum test	Results,
			Figure 2B,
			Table S9
Number of first-author	Life sciences versus Other fields	Two-tailed Wilcoxon rank sum test	Results,
CNS papers	p-value=1.23 x 10-2,		Figure 2C,
			Table S11
	Male vs Female Applicants
	p-value=4.54 x 10-2
Percentage of PhD & Postdoctoral Fellowships received by gender	p-value=2.4 x 10-3	Chi-squared test	Results,
		( 𝛘2 =12.10, df=2)	Figure 2D,
			Table S13
Number of off-site interviews	p-value=4.10 x 10-24	Two-tailed Wilcoxon rank sum test	Results,
by gender			Figure 3D,
			Table S8
Applications by gender	p=7.25 x 10-2,	Wilcoxon rank-sum test	Results
	off-sites p=0.1479, on-sites p=0.5813
	p=0.1775	Wilcoxon rank-sum test
The median number of offers also did not vary by gender.
Number of on-site interviews	p-value=1.20 x 10-13	Two-tailed Wilcoxon rank sum test	Results,
by gender			Figure 3D,
			Table S9
Number of offers that applicants received by gender	p-value=5.0 x 10-5	Two-tailed Wilcoxon rank sum test	Results,
			Figure 3D,
			Table S9
Percentage of applicants that applied for faculty jobs vs applicants that applied to other jobs	p-value=1.90 x 10-3	Two-tailed Wilcoxon rank sum test	Results,
			Figure 3E,
			Table S15
Percentage of applicants that had CNS publications and received off-site, on-site interviews or offers	Off-site interviews	Two-tailed Wilcoxon rank sum test	Results,
	p-value=0.33,		Figure 4A,
			Table S11
	On-site interviews
	p-value=2.70 x 10-4,
	Offers
	p-value=1.50 x 10-4
Wilcoxon Analysis of scholarly metrics & offers received	CNS 1st authors Papers	Two-tailed Wilcoxon rank sum test with Holm correction	Results,
	p-value=1.70 x 10-3,		Figure 4B,
			Tables S6, S9, S11, S20, S21
	Career Transition Award
	p-value=2.50 x 10-2,
	Total Citations
	p-value=2.92 x 10-2,
	Years on the Job Market
	p-value=3.45 x 10-2,
	Postdoc Fellowship
	p-value=0.1690,
	Total Publications
	p-value=0.1904,
	CNS co-authorship papers
	p-value=0.3353,
	H-index
	p-value=0.5724,
	Years as Postdoc
	p-value=1.0,
	1st Author papers
	p-value=1.0,
	Patents
	p-value=1.0,
	PhD Fellowship
	p-value=1.0
Breakdown of respondents by significant criteria: citation count, independent funding, and offers	citation count (all publications) distributions for groups by CNS 1st Authorship	Two-tailed Wilcoxon rank sum test	Results,
	p-value=4.0 x 10-2		Figure 4C
	independent funding, and offers
	p-value=4.0 x 10-2
	Applicants with CNS
Pie-charts: Breakdown of respondents with independent funding into groups with/without CNS papers and offers	p-value=0.5587
		Chi-squared test
	Applicants without CNS	(𝛘2 = 0.34188,
	p-value=0.166	df = 1),
		Chi-squared test
		(𝛘2 =1.9183,
		df = 1),
Teaching experience & R1/PUI type application	p-value=0.5592	Chi-squared test	Results,
		(𝛘2 = 0.410)	Figure 5C,
			Table S27
Teaching experience & offer percentage	p-value=0.1633	Two-tailed Wilcoxon rank sum test	Results,
			Figure 5D,
			Table S27
Percentage of 1st authored papers by PUI applicants by gender	p-value=0.8882	Two-tailed Wilcoxon rank sum test	Results,
			Figure 6B,
			Table S26
Percentage of Applicants that had adjunct lectureship teaching experience	p-value=4.997 x 10-4	Chi-squared test	Results,
		(𝛘2 = 27.515)	Figure 6F,
			Table S28
Applicants who applied to PUI only or R1 or both by adjunct teaching experience	PUI only	Two-tailed Wilcoxon rank sum test	Results,
	p-value=0.5538,		Figure 6G
	R1 or Both R1 & PUI
	p-value=0.9896
Median numbers by gender: application, remote(off-site) & on-site interviews, offer of a faculty position	p-values: gender=0.0725, off-site=0.1479, on-site=0.5813, offer=0.1775	Two-tailed Wilcoxon rank sum test	Results,
			Page 10
CNS publications with at least one offer	p-value=0.033	Chi-squared test	Results
		(𝛘2 = 4.4871)
Percentage of life/biomedical science applicants that had CNS publications and received off-site, on-site interviews or offers	Off-site interviews	Two-tailed Wilcoxon rank sum test	Results,
	p-value=0.45,		Figure S4A,
			Table S12
	On-site interviews
	p-value=4.20 x 10-4,
	Offers
	p-value=1.10 x 10-4
Wilcoxon Analysis of scholarly metrics & offers received for life/biomedical science applicants	CNS 1st authors Papers		Results,
	p-value=1.0 x 10-4,		Figure S4B,
			Tables S10, S12
	Career Transition Award
	p-value=1.0 x 10-3,
	Total Citations
	p-value=3.0 x 10-3,
	Years on the Job Market
	p-value=2.0 x 10-3,
	Postdoc Fellowship
	p-value=0.02,
	Total Publications
	p-value=0.1583,
	CNS co-authorship papers
	p-value=0.05623,
	H-index
	p-value=0.1378,
	Years as Postdoc
	p-value=0.4173,
	1st Author papers
	p-value=0.2947,
	Patents
	p-value=0.6051,
	PhD Fellowship
	p-value=0.9089
Breakdown of life/biomedical science respondents by significant criteria: citation count & CNS 1st authorship, or citation count & career award and offers	citation count (all publications) distributions for CNS 1st Authorship and offer	Two-tailed Wilcoxon rank sum test	Results,
	p-value=0.08919		Figure S4C
	citation count (all publications) distributions for no CNS 1st Authorship and offer
	p-value=0.3035
	citation count (all publications) distributions for career award and offer
	p-value=0.5243
	citation count (all publications) distributions for no career award and offer
Breakdown of life/biomedical science respondents into groups with/without CNS papers, with/without career awards, and offers	p-value=0.03273
