# Supplementary material for: A survey-based analysis of the academic job market
Source: eLife. 2020 Jun 12;9:e54097. doi: 10.7554/eLife.54097 (PMC7360372; doi:10.7554/eLife.54097)
Supplement: Supplementary file 8. — Overview of number of postdoctoral positions that the candidates held at the time of their faculty job application. All percentages are calculated out of the total number of respondents to this particular survey question. [file elife-54097-supp8.xlsx]

## Sheet: Sheet1
Table S8. Applicant Demographics: Applicants with first or multiple postdoctoral position
Theme	Number of applicants
Applicants who applied while in their first postdoctoral position	68.2% (191 out of 280)
(out of applicants who responded to this question)
Female applicants who applied while in their first postdoctoral position	76% (116 out of 153)
Male applicants who applied while in their first postdoctoral position	63% (101 out of 160)
Applicants who applied while in their second postdoctoral position	25.4% (71 out of 280)
Applicants who applied while in their third postdoctoral position	6.4% (18 out of 280)
Applicants who applied while in their 2nd-3rd postdoctoral position (out of applicants who responded to this question)	31.8% (89 out of 280)
Responded to this survey Question	88.3% (280 out of 317)
Did not respond to this survey Question	11.7% (37 out of 317)
