# Supplementary material for: A survey-based analysis of the academic job market
Source: eLife. 2020 Jun 12;9:e54097. doi: 10.7554/eLife.54097 (PMC7360372; doi:10.7554/eLife.54097)
Supplement: Supplementary file 11. — Overview of the number of Cell/Nature/Science (“CNS”) journal publications of our job applicant survey respondents by gender breakdown. Percentages are calculated out of the total number of respondents to this particular survey question. [file elife-54097-supp11.xlsx]

## Sheet: Sheet1
Table S11. Applicant responses on Cell/Nature/Science or “CNS” journal publications
Theme	Metrics for All applicants	Metrics for Female applicants (n=153)	Metrics for Male applicants	Metrics for applicants who did not disclose gender (n=4)
	(n=317)		(n=160)
Number of applicants who responded to this survey question who had published at least one “CNS” papers	0.26	0.201	0.321	0.333
	(81 out of 311)	(30 out of 149)	(50 out of 156)	(1 out of 3)
Published One “CNS” paper of any authorship type out of those applicants who published CNS	0.778	0.867	0.74	0
	(63 out of 81)	(26 out of 30)	(37 out of 50)	(0 out of 1)
Published any 1st author “CNS” paper out all applicants	0.161	0.058	0.1	Less than 1%
	(50 out of 311)	(18 out of 311)	(31 out of 311)	(1 out of 311)
Published more than one “CNS” paper of any authorship type	0.234	0.133	0.28	1
	(19 out of 81)	(4 out of 30)	(14 out of 50)	(1 out of 1)
Number of applicants who responded to this survey question and had Not published “CNS” papers	0.733	0.799	0.679	0.667
	(228 out of 311)	(119 out of 149)	(106 out of 156)	(2 out of 3)
Did not respond to this survey Question	0.025	0.026	0.025	0.25
	(8 out of 317)	(4 out of 153)	(4 out of 160)	(1 out of 4)
Applicants who published One 1st author “CNS” paper	0.518	0.533	0.52	0
	(42 out of 81)	(16 out of 30)	(26 out of 50)	(0 out of 1)
Applicants who published Two 1st author “CNS” papers	0.099	0.067	0.1	1
	(8 out of 81)	(2 out of 30)	(5 out of 50)	(1 out of 1)
Applicants who published One co-author “CNS” paper	0.42	0.5	0.36	1
	(34 out of 81)	(15 out of 30)	(18 out of 50)	(1 out of 1)
Applicants who published more than one co-author “CNS” paper	0.074	0.033	0.1	0
	(6 out of 81)	(1 out of 30)	(5 out of 50)	(0 out of 1)
Applicants who published One corresponding author “CNS” paper	0.025	0	0.04	0
	(2 out of 81)	(0 out of 30)	(2 out of 50)	(0 out of 1)
Applicants who published more than one corresponding author “CNS” paper	0.025	0	0.04	0
	(2 out of 81)	(0 out of 30)	(2 out of 50)	(0 out of 1)
