# Supplementary material for: A survey-based analysis of the academic job market
Source: eLife. 2020 Jun 12;9:e54097. doi: 10.7554/eLife.54097 (PMC7360372; doi:10.7554/eLife.54097)
Supplement: Supplementary file 12. — Overview of the number of Cell/Nature/Science (“CNS”) journal publications of our job applicant survey respondents in life/biomedical sciences (respondents who indicated their field of research as Chemistry, Biology, Bioengineering or Biomedical or Life Sciences) by gender breakdown. Percentages are calculated out of the total number of respondents to this particular survey question. [file elife-54097-supp12.xlsx]

## Sheet: Sheet1
Table S12. Life/Biomedical Science Applicant responses on Cell/Nature/Science or “CNS” journal publications
Theme	Metrics for All applicants	Metrics for Female applicants (n=131)	Metrics for Male applicants	Metrics for applicants who did not disclose gender (n=3)
	(n=267)		(n=133)
Number of applicants who responded to this survey question who had published at least one “CNS” papers	0.271	0.211	0.364	0.5
	(71 out of 262)	(27 out of 128)	(48 out of 132)	(1 out of 2)
Published One “CNS” paper of any authorship type out of those applicants who published CNS	0.724	0.815	0.69	0
	(55 out of 76)	(22 out of 27)	(33 out of 48)	(0 out of 1)
Published any 1st author “CNS” paper out of all applicants	0.18	0.13	0.233	0.33
	(48 out of 267)	(17 out of 131)	(31 out of 133)	(1 out of 3)
Published more than one “CNS” paper of any authorship type	0.276	0.185	0.312	1
	(21 out of 76)	(5 out of 27)	(15 out of 48)	(1 out of 1)
Number of applicants who responded to this survey question and had Not published “CNS” papers	0.706	0.789	0.636	0.5
	(185 out of 262)	(101 out of 128)	(84 out of 132)	(1 out of 2)
Did not respond to this survey Question	0.022	0.023	0.015	0.33
	(6 out of 267)	(3 out of 131)	(2 out of 133)	(1 out of 3)
Applicants who published One 1st author “CNS” paper	0.5	0.555	0.479	0
	(38 out of 76)	(15 out of 27)	(23 out of 48)	(0 out of 1)
Applicants who published Two 1st author “CNS” papers	0.132	0.074	0.146	1
	(10 out of 76)	(2 out of 27)	(7 out of 48)	(1 out of 1)
Applicants who published One co-author “CNS” paper	0.526	0.481	0.542	1
	(40 out of 76)	(13 out of 27)	(26 out of 48)	(1 out of 1)
Applicants who published more than one co-author “CNS” paper	0.066	0.037	0.083	0
	(5 out of 76)	(1 out of 27)	(4 out of 48)	(0 out of 1)
Applicants who published One corresponding author “CNS” paper	0.066	0	0.104	0
	(5 out of 76)	(0 out of 27)	(5 out of 48)	(0 out of 1)
Applicants who published more than one corresponding author “CNS” paper	0.013	0	0.021	0
	(1 out of 76)	(0 out of 27)	(1 out of 48)	(0 out of 1)
