# Supplementary material for: A survey-based analysis of the academic job market
Source: eLife. 2020 Jun 12;9:e54097. doi: 10.7554/eLife.54097 (PMC7360372; doi:10.7554/eLife.54097)
Supplement: Supplementary file 13. — Overview of the types of funding held by our job applicant survey respondents. Percentages are calculated out of the total number of respondents to this particular survey question. All percentages are calculated out of the total number of respondents to this particular survey question. Our survey questions did not distinguish between the types (e.g. government funded vs privately funded, full vs partial salary support) or number of fellowships applied to; many of these factors are likely critical in better understanding gender differences in fellowship support. [file elife-54097-supp13.xlsx]

## Sheet: Sheet1
Table S13. Applicant Fellowship type Funding Record
Theme	Pre-doctoral Fellowship	Post-doctoral Fellowship	Both types of fellowships	Received any type of fellowship	Received None	Did not Respond to this question
All Applicants (n=317)	0.149	0.267	0.378	0.8	0.2	less than 1%
	(47 out of 315)	(84 out of 315)	(119 out of 315)	(252 out of 315)	(63 out of 315)	(2 out of 317)
Applicants who applied to PUIs	0.192	0.288	0.269	0.779	0.221	~1%
	(20 out of 104)	(30 out of 104)	(28 out of 104)	(81 out of 104)	(23 out of 104)	(1 out of 104)
Female Applicants	0.158	0.23	0.487	0.875	0.125	less than 1%
(n=153)	(24 out of 152)	(35 out of 152)	(74 out of 152)	(133 out of 152)	(19 out of 152)	(1 out of 152)
Female applicants who applied to PUIs	0.155	0.276	0.379	0.828	0.172	0.017
	(9 out of 58)	(16 out of 58)	(22 out of 58)	(48 out of 58)	(10 out of 58)	(1 out of 58)
Male Applicants	0.138	0.302	0.277	0.723	0.277	less than 1%
(n=160)	(22 out of 159)	(48 out of 159)	(44 out of 159)	(115 out of 159)	(44 out of 159)	(1 out of 159)
Male applicants who applied to PUIs	0.25	0.318	0.136	0.705	0.295	0
	(11 out of 44)	(14 out of 44)	(6 out of 44)	(31 out of 44)	(13 out of 44)	(0 out of 44)
Non-Binary Applicants (0)	0	0	0	0	0	0
Preferred not to disclose gender(n=4)	0.25	0.25	0.25	0	0	0
	(1 out of 4)	(1 out of 4)	(1 out of 4)
Preferred not to disclose gender who applied to PUIs	0.5	0	0	1	0	0.5
	(1 out of 2)	(0 out of 2)	(0 out of 2)	(2 out of 2)	(0 out of 2)	(1 out of 2)
Theme	Responded PhD + Both PhD & Postdoc Fellowships		Responded Postdoc + Both PhD & Postdoc Fellowships
Female Applicants	0.65		0.717
	(98 out of 152)		(109 out of 152)
Male Applicants	0.415		0.579
	(66 out of 159)		(92 out of 159)
Preferred not to disclose gender	0.5		0.5
	(2 out of 4)		(2 out of 4)
