# Supplementary material for: A survey-based analysis of the academic job market
Source: eLife. 2020 Jun 12;9:e54097. doi: 10.7554/eLife.54097 (PMC7360372; doi:10.7554/eLife.54097)
Supplement: Supplementary file 14. — Overview of candidates who had unpublished preprints at the time of their job application. Percentages are calculated out of the total number of respondents to this particular survey question. [file elife-54097-supp14.xlsx]

## Sheet: Sheet1
Table S14. Applicant responses to the question on number of Active Preprints (all preprints online not peer-reviewed yet) at the time of application
Theme	Applicant number	Female Applicants (n=153)	Male Applicants (n=160)	Did not disclose gender applicants (n=4)
	(All n=317)
Applicants who responded to this survey Question	0.94	0.454	0.476	Less than 1%
	(298 out of 317)	(144 out of 317)	(151 out of 317)	(3 out of 317)
Yes Had posted unpublished Preprints	0.396	0.368	0.417	0.667
	(118 out of 298)	(53 out of 144)	(63 out of 151)	(2 out of 3)
Posted 1 unpublished preprint	0.215	0.208	0.219	0.333
	(64 out of 298)	(30 out of 144)	(33 out of 151)	(1 out of 3)
Posted 2 unpublished preprints	0.121	0.104	0.132	0.333
	(36 out of 298)	(15 out of 144)	(20 out of 151)	(1 out of 3)
Posted 3 unpublished preprints	0.027	0.042	0.013	0
	(8 out of 298)	(6 out of 144)	(2 out of 151)	(0 out of 3)
Posted more than 3 unpublished preprints	0.034	0.014	0.053	0
	(10 out of 298)	(2 out of 144)	(8 out of 151)	(0 out of 3)
No Had NOT posted unpublished Preprints	0.604	0.632	0.583	0.333
	(180 out of 298)	(91 out of 144)	(88 out of 151)	(1 out of 3)
Did not respond to this survey Question	0.06	0.059	0.056	0.25
	(19 out of 317)	(9 out of 153)	(9 out of 160)	(1 out of 4)
Total number of all Career Preprints published by Applicants
Theme	Applicant number	Female Applicants (n=153)	Male Applicants (n=160)	Did not disclose gender applicants (n=4)
	(All n=317)
Applicants who responded to this survey Question	0.851	0.394	0.448	Less than 1%
	(270 out of 317)	(125 out of 317)	(142 out of 317)	(3 out of 317)
Yes Had posted Preprints throughout career	0.548	0.48	0.606	0.667
	(148 out of 270)	(60 out of 125)	(86 out of 142)	(2 out of 3)
Posted 1 preprint	0.2	0.24	0.162	0.333
	(54 out of 270)	(30 out of 125)	(23 out of 142)	(1 out of 3)
Posted 2 preprints	0.148	0.136	0.162	0
	(40 out of 270)	(17 out of 125)	(23 out of 142)	(0 out of 3)
Posted 3 preprints	0.063	0.048	0.077	0%(0 out of 3)
	(17 out of 270)	(6 out of 125)	(11 out of 142)
Posted more than 3 preprints	0.137	0.056	0.204	33.3%(1 out of 3)
	(37 out of 270)	(7 out of 125)	(29 out of 142)
No Had NOT posted Any Preprints	0.452	0.52	0.394	33.3%(1 out of 3)
	(122 out of 270)	(65 out of 125)	(56 out of 142)
Did not respond to this survey Question	0.139	0.183	0.113	25%(1 out of 4)
	(47 out of 317)	(28 out of 153)	(18 out of 160)
