# Supplementary material for: A survey-based analysis of the academic job market
Source: eLife. 2020 Jun 12;9:e54097. doi: 10.7554/eLife.54097 (PMC7360372; doi:10.7554/eLife.54097)
Supplement: Supplementary file 15. — Overview of the responses to a twitter poll with the question: “Faculty, when you accepted your first position, how many offers did you have to choose from?” [file elife-54097-supp15.xlsx]

## Sheet: Sheet1
Table S15. Twitter Poll: Number of offers current faculty received
Theme	1	2020-03-02	4+	Just show me the poll results
Number of Respondents (n=749)	21% (167)	20% (160)	8% (63)	51% (404)
