# Supplementary material for: A survey-based analysis of the academic job market
Source: eLife. 2020 Jun 12;9:e54097. doi: 10.7554/eLife.54097 (PMC7360372; doi:10.7554/eLife.54097)
Supplement: Supplementary file 16. — Overview of candidates who also applied for non-faculty jobs (e.g. Industry positions, government jobs, etc.). Percentages are calculated out of the total number of respondents to this particular survey question (n = 315 applicants). [file elife-54097-supp16.xlsx]

## Sheet: Sheet1
Table S16. Applicants who also applied to Non-faculty jobs
Theme	Applicant number
Total Number of Applicants who responded to this question	99.4% (315 out of 317)
Yes applied to non-faculty jobs	28.6% (90 out of 315)
Research scientist in federal government	1.3% (4 out of 315)
R&D positions in biotech companies	1.6% (5 out of 315)
Non-Governmental Organizations (NGO)	Less than 1% (1 out of 315)
National Institutes of Health (NIH)	Less than 1% (1 out of 315)
Science communication job	Less than 1% (2 out of 315)
Community involvement job	Less than 1% (1 out of 315)
Non-profit organizations	Less than 1% (1 out of 315)
Museum Curation (non-profit, government)	Less than 1% (2 out of 315)
Geophysical Laboratory of a research Institution of Science(Non-profit)	Less than 1% (1 out of 315)
Private laboratories	Less than 1% (1 out of 315)
Zoos	Less than 1% (1 out of 315)
No did NOT apply to non-faculty jobs	71.4% (225 out of 315)
Did not respond to this survey Question	Less than 1% (2 out of 317)
