# Supplementary material for: A survey-based analysis of the academic job market
Source: eLife. 2020 Jun 12;9:e54097. doi: 10.7554/eLife.54097 (PMC7360372; doi:10.7554/eLife.54097)
Supplement: Supplementary file 17. — Candidate responses to “Was any aspect of your career particularly helpful when applying (preprints, grants etc.)?” Survey participants were able to provide long answers to this comment question. A word cloud referring to this table of comments is provided in Figure 8A. [file elife-54097-supp17.xlsx]

## Sheet: Sheet1
Table S17. Themes from Job Applicant survey written responses to helped your application
Theme	Survey Responses	Frequency of the response n
Networking	Built an extensive network of colleagues and collaborators: future colleagues lobbied heavily for me	-4
	Attending many meetings, hugely important in my success	-4
	Personal connections seemed helpful and fit seemed really important	-4
Preprints	Preprints were enormously helpful: interview based on pre-print, offer based on preprint, helpful to show adopting new techniques and productivity, was looked favorably upon much before paper published	-4
Publications	Paper being accepted was important	-5
	non-CNS publications in other high impact factor journals	-1
	CNS publications helped get my position	-2
Research Field	Performing interdisciplinary research	-1
	Learning a new research technique	-1
	Research area being perfect fit for department: asking hiring departments what/which field/expertise they are looking for	-4
Mentoring	Mentoring goals align well with those of the university	-3
	Having mentors helps you get through this process	-1
	Having colleagues/mentors (both early career and senior) review and comment on application	-3
	Significant amount of leadership experience: through helping to start an internship for underrepresented minority undergraduates	-1
Teaching	Teaching experience being perfect fit for department	-1
	Teaching certificate was immensely helpful for teaching focused positions.	-1
Funding	Having funding in the past: e.g. Postdoctoral Fellowship (NIH F32 fellowship) and K awards, Marie Curie fellowship, Human Frontier fellowship were looked favorably upon	-12
	Institutional Research and Academic Career Development Award	-1
	Experience of writing grants: co-written with PI, scored not funded	-1
Pedigree	PhD and/or Postdoctoral lab pedigree	-3
Service	Serving as a reviewer for journals	-1
Other Skills	Other skills are also important not just research skills	-1
Randomness	The process of applying and finding a job seems completely up to luck/lottery, that there is no magic formula to this, but having amazing mentors helps you get through this process.	-3
