# Supplementary material for: A survey-based analysis of the academic job market
Source: eLife. 2020 Jun 12;9:e54097. doi: 10.7554/eLife.54097 (PMC7360372; doi:10.7554/eLife.54097)
Supplement: Supplementary file 18. — Candidate responses to “Was any aspect of your career particularly an obstacle when applying?” Survey participants were able to provide long answers to this comment question. A word cloud referring to this table of comments is provided in Figure 8B. [file elife-54097-supp18.xlsx]

## Sheet: Sheet1
Table S18. Themes from written Applicant responses to obstacle for their application
Theme	Survey Responses	Frequency of the response n
No application feedback	Hard to say because I got no feedback, More transparency from the search committee would have been great.	-5
Nepotism	Nepotism based on advisor name	-3
	Nepotism based on institution pedigree	-1
	Same finalists invited everywhere: all the top schools only invited these anointed candidates for site interviews, Lack of breadth and diversity in the pool of on-site candidates	-1
Personal Life concerns	Maternity leave	-3
	Two-body problem	-1
	(partners finding jobs in the same vicinity)
	Work-Family balance (balancing care for children with time-consuming and stressful faculty job applications)	-2
Poor Mentorship	No mentor that gave feedback on writing grants	-8
	Lack of mentorship on how to handle the on-site interview and structure my proposed work talk.	-1
Publications	Lack of postdoc papers being accepted	-3
	lack of CNS papers	-4
	harmful was not having postdoc papers all in preparation and not published yet	-1
	publication gap following the birth of my first child was a problem	-2
	Maintaining productivity in the lab while preparing applications was difficult.	-1
Preprints	Lack of Preprints	-1
Citizenship	Not being a US citizen made it hard to apply for the majority of fellowships or the NIH K or F type awards	-3
Language Skills	Level of speaking English is a big hurdle.	-1
Research Field	No offers due to in vitro work instead on in vivo research (lack of fit)	-1
	Interdisciplinary research was underappreciated	-6
	Not Moving Institutions from PhD to postdoc	-1
	Working in industry for a few years before applying to academic positions.	-1
Teaching	Lack of teaching experience that would have also helped with writing teaching statements	-2
Funding	Lack of Funding: No funding, ability to procure outside funding	-8
Randomness/Chaos	The academic market is 90% chaos and privilege. It's like the lottery, but worse.	-1
