# Supplementary material for: A survey-based analysis of the academic job market
Source: eLife. 2020 Jun 12;9:e54097. doi: 10.7554/eLife.54097 (PMC7360372; doi:10.7554/eLife.54097)
Supplement: Supplementary file 19. — Overview of application statistics: total number of applications made, offsite (remote via phone or online via Skype) interviews, onsite interviews, offers made, approximate number of rejections and total number of no feedbacks received from faculty job committees to our survey respondents. [file elife-54097-supp19.xlsx]

## Sheet: Sheet1
Table S19. Application statistics
Theme	Total Applicant number (n=317)	Female Applicants responded to this Q (n=131)	Male Applicants (n=160)	Did not disclose gender (n=4)
Total Number of all Applications made	7644	3268	4256	120
Total Number of off-site interviews	805	437	359	9
Total Number of on-site interviews	832	431	386	15
Total Number of offers	359	196	153	10
Approximate Number of rejections	2920	1118	1742	60
Total number of No Feedbacks (did not hear anything back)	4365
		2150	2514	60
Did not respond to this survey Question	0	22	0	0
Mean Number of Applications made	Average = 24.1;	Average = 21.4;	Average = 26.6;	Average = 30;
	Median = 15	Median = 13	Median = 16.5	Median = 16
Number of applicants with at least one off-site interview	0.7	0.719	0.681	0.75
	(220 out of 317)	(110 out of 153)	(109 out of 160)	(3 out of 4)
Number of applicants with at least one on-site interview	0.776	0.758	0.794	0.75
	(246 out of 317)	(116 out of 153)	(127 out of 160)	(3 out of 4)
Number of applicants with at least one offer	0.583	0.6	0.569	0.5
	(185 out of 317)	(92 out of 153)	(91 out of 160)	(2 out of 4)
