# Supplementary material for: A survey-based analysis of the academic job market
Source: eLife. 2020 Jun 12;9:e54097. doi: 10.7554/eLife.54097 (PMC7360372; doi:10.7554/eLife.54097)
Supplement: Supplementary file 20. — Overview of the types of transition/independent type funding held by our faculty candidate (applicant survey) respondents. Percentages are calculated out of the total number of respondents to this particular survey question. Being a ‘Co-PI’ of a grant as a postdoctoral researcher or research scientist means co-writing a grant with a PI (an independent investigator). The co-writer may or may not be explicitly mentioned on the grant as a Co-PI. [file elife-54097-supp20.xlsx]

## Sheet: Sheet1
Table S20. Applicant record of Career transition awards
Theme	Postdoctoral-to-faculty transition award of any kind the(e.g. K99, K01)	Co-PI grants	Total applicants who held a transition award or a co-PI grant	None (No independent funding)	Did not Respond to this question
All Applicants (n=317)	0.159	0.105	0.251	0.748	Less than 1% (3 out of 317)
	(50 out of 314)	(33 out of 314)	(79 out of 314)	(235 out of 314)
Female Applicants	0.171	0.125	0.283	0.717	Less than 1% (1 out of 153)
(n= 153)	(26 out of 152)	(19 out of 152)	(43 out of 152)	(109 out of 152)
Male Applicants (n=160)	0.152	0.082	0.209	0.791	0.012
	(24 out of 158)	(13 out of 158)	(33 out of 158)	(125 out of 158)	(2 out of 160)
Non-Binary Applicants (n=0)	0	0	0	0	0
Preferred not to disclose gender (n=4)	0	0.25	0.75	0.25	0
		(1 out of 4)	(3 out of 4)	(1 out of 4)
