# Supplementary material for: A survey-based analysis of the academic job market
Source: eLife. 2020 Jun 12;9:e54097. doi: 10.7554/eLife.54097 (PMC7360372; doi:10.7554/eLife.54097)
Supplement: Supplementary file 21. — Overview of Candidates who had approved or pending patents from their research at the time of their job application. Percentages are calculated out of the total number of respondents to this particular survey question. [file elife-54097-supp21.xlsx]

## Sheet: Sheet1
Table S21. Applicant responses on Patenting of their research
Theme	Applicant number	Female Applicants (n=153)	Male Applicants (n=160)	Did not disclose gender (n=4)
Total Number of Applicants who responded to this survey question	0.94	0.941	0.944	0.75
	(298 out of 317)	(144 out of 153)	(151 out of 160)	(3 out of 4)
Yes Had approved or pending patents	0.188	0.153	0.225	0
	(56 out of 298)	(22 out of 144)	(34 out of 151)	(0 out of 3)
had 1 approved or pending patent	0.121	0.118	0.126	0
	(36 out of 298)	(17 out of 144)	(19 out of 151)	(0 out of 3)
had 2 approved or pending patents	0.04	0.021	0.06	0
	(12 out of 298)	(3 out of 144)	(9 out of 151)	(0 out of 3)
had 3 approved or pending patents	less than 1%	0.014	0	0
	(2 out of 298)	(2 out of 144)	(0 out of 151)	(0 out of 3)
had more than 3 approved or pending patents	0.02	0	0.04	0
	(6 out of 298)	(0 out of 144)	(6 out of 151)	(0 out of 3)
No did NOT hold any pending or approved patents	0.812	0.847	0.775	1
	(241 out of 298)	(122 out of 144)	(117 out of 151)	(3 out of 3)
Preferred Not to disclose information	0.06	0.059	0.056	0.25
	(19 out of 317)	(9 out of 153)	(9 out of 160)	(1 out of 4)
