# Supplementary material for: A survey-based analysis of the academic job market
Source: eLife. 2020 Jun 12;9:e54097. doi: 10.7554/eLife.54097 (PMC7360372; doi:10.7554/eLife.54097)
Supplement: Supplementary file 22. — Overview of candidates who were familiar with the Future PI Slack resource and other resources during their application process. Responses to “Did you find the Future PI google sheet/Slack helpful? Yes/No” Survey participants were able to provide a long answer to this comment question (Future PI Slack or FPI Slack is a Slack group comprised of postdoctoral researchers aspiring to apply for faculty/Principal Investigator positions). [file elife-54097-supp22.xlsx]

## Sheet: Sheet1
Table S22. Applicants’ use of resources that offered information about the application process
Got help from	Said Yes Used & Yes Useful	Number of applicants who received at least Offers	Said No
Future PI Slack	9.5% & 8.5%	0.667	0.107
	(30 out of 317 & 27 out of 317)	(20 out of 30)	(34 out of 317)
Chemblogger	0.016	0.4	-
	(5 out of 317)	(2 out of 5)
EcoEvoJobsWiki	0.013	0.75	-
	(4 out of 317)	(3 out of 4)
PsychJobsWiki	Less than 1%	1	-
	(1 out of 317)	(1 out of 1)
