# Supplementary material for: A survey-based analysis of the academic job market
Source: eLife. 2020 Jun 12;9:e54097. doi: 10.7554/eLife.54097 (PMC7360372; doi:10.7554/eLife.54097)
Supplement: Supplementary file 23. — Overview of candidates who were familiar with the Future PI Slack resource and other resources during their application process. Responses to “Why did you find the Future PI google sheet/Slack helpful?” Survey participants were able to provide a long answer to this comment question. Note: Future PI Slack is a Slack group of postdoctoral researchers who aspire to apply for faculty positions. [file elife-54097-supp23.xlsx]

## Sheet: Sheet1
Table S23. Applicant responses to “Why did you find the Future PI Google Sheet helpful?"
Theme (frequency of responses)	Survey Responses
Very helpful or helpful (30)	The Future PI slack channel/spreadsheet was really helpful to guide me during the process providing real time feedback of what's going on in the job market in comparison to advice from PIs that experienced years ago (or that experienced in a completely different way that I did).
	It helped me realize my status with more than 70% of the universities that I had applied to. This is a much better approach (quick painless death to a school I have not been called for, but others have) than patiently waiting, hoping against hope as the months drag by.
	Did not find the Future PI google sheet particularly helpful because there is almost no one else on there in my field. But I did find the Future PI slack discussions helpful. The future PI google sheet was super helpful to ask questions, vent, cross out schools that ghosted me but others have heard back from, and just overall learn a ton of tips on navigating this process.
	Found it useful to keep track of whether other people had heard back from schools I applied to or not.
	Used Future PI google sheet helpful but also stressful. I also think it’s heavily biased towards those who are successful on the job market- thus not a good picture of the actual process. I think >90% of people who filled out the application stats had at least one onsite visit. I do not think this is indicative of most people's success rate.
	The Future PI Slack and spreadsheet was very helpful for tracking interviews and asking advice.
	Checked the future PI spreadsheet almost every day. It was almost like a soulmate during the ridiculously stressful process. I never realized that so many people have similar anxieties, insecurities, and questions as me. Applying for a faculty job is a very isolating process, only a few postdocs that I personally knew were sailing in the same boat. Access to the information & comments posted ther…
	Future PI google sheet and slack group were both extremely helpful.
	Really useful because at least you know if someone got selected for the position.
	The Future PI google sheet was a great resource for understanding the timing of things, how many applications people submitted, and general advice/feedback.
	It was helpful to know if others had heard from places I had not as well as get a sense of the general competitiveness of the market.
	Found the Future PI google sheet very helpful to know when other people heard back from jobs I had applied to.
	Found the google sheet very helpful, though not many of the listings were in my field it was nice to see the expected timings from one step to the next, and see where my search landed in terms of response rates.
	The Future PI google sheet and it was incredibly helpful. The community of other postdocs on the market helping each other deal with questions and anxieties really helped to demystify the black box that is the faculty search.
	Future PI google sheet was extremely useful to track the status of jobs and to ask for advice.
	It was great for moral support.
	It was extremely helpful to not feel so alone in the process.
