# Supplementary material for: A survey-based analysis of the academic job market
Source: eLife. 2020 Jun 12;9:e54097. doi: 10.7554/eLife.54097 (PMC7360372; doi:10.7554/eLife.54097)
Supplement: Supplementary file 24. — Regression analysis with stepwise variable selection was performed on the job applicant survey data. All variables collected except for the number of remote and on-site interviews were included as potential predictors of receiving (Cyranoski et al., 2011) or not receiving (0) a job offer. Positive coefficients indicate positive associations and negative coefficients indicate negative associations with receiving an offer. Coefficients that are zero indicate no association. Bold values indicate that the associations were found to be significant at a threshold of 0.05. Summary of results testing criteria with offer outcomes either through Wilcoxon analyses or logistic regression. When applicants with missing values were excluded, application number (β=0.5345, p=1.53×10−3), having a postdoctoral fellowship (β=0.4013, p=6.23×10−3), and number of citations (β=0.4178, p=2.01×10−2) positively associated with offer status in a significant manner, while searching for other jobs (β=−0.3902, p=1.04×10−2) negatively associated with offer status in a significant manner. When missing values were imputed, significant positive coefficients were observed for application number (β=0.5171, p=8.55×10−4), funding (β=0.3156, p=1.72×10−2), having a postdoctoral fellowship (β=0.2583, p=3.75×10−2) and citations (β=0.4363, p=1.34×10−2). Moreover, the search for non-academic jobs (β=−0.2944, p=1.98×10−2) and the number of years on the job market (β=−0.2286, p=7.74×10−2) were significantly negatively associated with offer status. [file elife-54097-supp24.xlsx]

## Sheet: Sheet1
Table S24. Logistic regression with stepwise variable selection analysis on the survey data
VARIABLE	Coefficient		P-Value		STD. Error		Z-Value
	Missing data excluded	Missing data imputed	Missing data excluded	Missing data imputed	Missing data excluded	Missing data imputed	Missing data excluded	Missing values imputed
(Intercept)	0.3599	0.4156	1.33	9.41	0.1455	0.1257	2.4743	3.3077
			x 10-2	x 10-4
CNS co-authorship	0.1715	0.1178	3.68	3.94	0.1907	0.1381	0.8995	0.853
			x 10-1	x 10-1
Application number	0.5345	0.5171	1.53	8.55	0.1687	0.1551	3.1692	3.3344
			x 10-3	x 10-4
Other jobs	-0.3902	-0.2944	1.04	1.98	0.1523	0.1263	-2.5616	-2.3303
			x 10-2	x 10-2
Funding	0.1965	0.3156	1.87	1.72	0.1491	0.1324	1.3181	2.3834
			x 10-1	x 10-2
Postdoc Fellowship	0.4013	0.2583	6.23	3.75	0.1467	0.1242	2.7352	2.0801
			x 10-3	x 10-2
Citations	0.4178	0.4363	2.01	1.34	0.1797	0.1764	2.3253	2.4735
			x 10-2	x 10-2
Years on the Market	-0.1105	-0.2286	4.53	7.74	0.1474	0.1295	-0.7497	-1.7661
			x 10-1	x 10-2
