# Supplementary material for: A survey-based analysis of the academic job market
Source: eLife. 2020 Jun 12;9:e54097. doi: 10.7554/eLife.54097 (PMC7360372; doi:10.7554/eLife.54097)
Supplement: Supplementary file 26. — Overview of job application survey respondents’ (total and by gender) applications to R1 Universities (high-activity Research Universities), PUIs (Primarily Undergraduate Institutions; see 1 for definitions) or applied to both types of institutions. Percentages are calculated out of the total number of respondents to this particular survey question. [file elife-54097-supp26.xlsx]

## Sheet: Sheet1
Table S26. Applicants by their application type (R1 Universities, PUIs or both) & Gender
Theme	Total Applicant number	Female Applicant number	Male Applicant number	Did not disclose gender Applicant number
Total Number of Applicants	1	0.483	0.505	0.013
	(317 out of 317)	(153 out of 317)	(160 out of 317)	(4 out of 317)
R1 universities	0.672	0.627	0.725	0.5
	(213 out of 317)	(96 out of 153)	(116 out of 160)	(2 out of 4)
PUIs only	0.079	0.098	0.063	0
	(25 out of 317)	(15 out of 153)	(10 out of 160)	(0 out of 4)
Both R1 & PUIs	0.249	0.136	0.11	0.5
	(79 out of 317)	(43 out of 317)	(34 out of 317)	(2 out of 4)
Did not respond to this survey Question	0	0	0	0
	(0 out of 317)	(0 out of 153)	(0 out of 160)	(0 out of 4)
PUI Applicants’ First Author paper record
Total Number of Applicants	Total Applicant number	Female Applicant number	Male Applicant number	Did not disclose gender Applicant number
Applicants who applied to PUIs only	Max = 9;	Max = 7;	Max = 9;	Max = 0;
	Average = 4;	Average = 3.4;	Average = 4.2;	Average = 0;
	Median = 4;	Median = 4;	Median = 4;	Median = 0;
	Min = 1	Min = 1	Min = 1	Min = 0
Applicants who applied to Both R1 & PUIs (PUI only + both responses)	Max = 25;	Max = 20;	Max = 25;	Max = 5;
	Average = 6.3 ;	Average = 5.6;	Average = 7.3;	Average = 5;
	Median = 6;	Median = 5;	Median = 6.5;	Median = 5;
	Min = 1	Min = 1	Min = 1	Min = 5
Applicants who applied to PUIs & both R1 + PUI & Did not respond to this survey Question on their 1st author papers	0	0	0	0.5
	(0 out of 104)	(0 out of 58)	(0 out of 44)	(1 out of 2)
