# Supplementary material for: A survey-based analysis of the academic job market
Source: eLife. 2020 Jun 12;9:e54097. doi: 10.7554/eLife.54097 (PMC7360372; doi:10.7554/eLife.54097)
Supplement: Supplementary file 27. — Overview of the teaching experience (Teaching Assistantship for a course (lecture-based and/or laboratory-based) for the course instructor only versus beyond teaching assistantship which is independently designing and instructing undergraduate and/or graduate courses) of our applicant survey respondents. Percentages are calculated out of the total number of respondents to this particular survey question. [file elife-54097-supp27.xlsx]

## Sheet: Sheet1
Table S27. Applicant Teaching experience
Theme	No teaching experience	Yes-Teaching Assistantship (TA)	Yes-Beyond TA
All Applicants (n=317)	~1% (3 out of 317)	0.451	0.539
		(143 out of 317)	(171 out of 317)
Applicants who applied to PUIs	0	0.422	0.578
	(0 out of 102)	(43 out of 102)	(59 out of 102)
Female Applicants(n=153)	Less than 1%	0.425	0.569
	(1 out of 153)	(65 out of 153)	(87 out of 153)
Female Applicants who applied to PUIs	0% (0 out of 58)	0.431	0.569
		(25 out of 58)	(33 out of 58)
Male Applicants(n=160)	0.013	0.488	0.5
	(2 out of 160)	(78 out of 160)	(80 out of 160)
Male Applicants who applied to PUIs	0	0.409	0.591
	(0 out of 44)	(18 out of 44)	(26 out of 44)
Non-Binary Applicants(n=0)	0	0	0
Preferred not to disclose gender(n=4)	0	0	0.013
			(4 out of 317)
