# Supplementary material for: A survey-based analysis of the academic job market
Source: eLife. 2020 Jun 12;9:e54097. doi: 10.7554/eLife.54097 (PMC7360372; doi:10.7554/eLife.54097)
Supplement: Supplementary file 28. — Overview of specific types of teaching experience of our job applicant survey respondents detailed in a comment question. The “Adjunct Teaching Instructor for Undergraduate Courses at a Community College or PUI” and “Adjunct Teaching Instructor for Undergraduate Courses at an R1 or PU Institution” were explicitly mentioned in comments by our applicant survey respondents. The “Total Adjunct teaching positions” were the total head-count of “adjunct type” college teaching performed by our job applicant survey respondents. A total of n = 162 applicants responded to this comment type long answer question. [file elife-54097-supp28.xlsx]

## Sheet: Sheet1
Table S28. Themes from applicant written responses to specific types of teaching experiences they had beyond teaching assistantship
Theme	Example Survey Responses	Frequency of the response n
Instructed Undergraduate Courses	Taught undergraduate course as instructor of record	-55
Co-Instructed Undergraduate Courses	I have been a primary or co-instructor for several undergraduate classes	-10
Guest lectured Undergraduate courses	Guest lecturing undergraduates, mentoring undergraduates.	-8
Instructed Graduate Courses	Lectured medical school graduate school ~20 contact hours in first year, large multi-lecturer courses	-28
Co-Instructed Graduate Courses	co-taught course as a software and data carpentry instructor	-7
Guest-Lectured Graduate Courses	Guest lecturing undergraduates, mentoring undergraduates	-5
Independent Instructor/Lecturer	I taught two 1-year lectures.	-22
(type of course not specified)
Co-Instructor/Lecturer	Lecture an undergrad stats class for 2 years as an invited lecturer	-2
(type of course not specified)
Guest-Lecturer (type of course not specified)	Multiple guest lecturing occasions	-14
Lab Course Instructor	Laboratory instructor for 5 years,3 years as Lab course teacher as a postdoctoral fellow.	-2
Lecturing for Workshops	leading domain workshops at my university and others	-8
Instructor for High School Courses	High school teacher for 1 year, taught college level summer courses for high school students.	-2
Visiting Assistant Professorship	Visiting Professor at a liberal arts college	-2
Adjunct Teaching Instructor for Undergraduate Courses at a Community College or PUI	Adjunct faculty for one year, taught two undergraduate courses as faculty of record and prepared all the materials for both courses.	-16
Adjunct Teaching Instructor for Undergraduate courses at an R1 University	Adjunct faculty, designed a graduate course for 1 semester.	-2
Total Adjunct teaching positions (i.e. all college level teaching counts)	College level teaching experience (Adjunct undergraduate instructor or lecturer)	-29
Teaching Certificate	Graduate student teaching certificate	-4
Teaching Assistant for Undergraduate or Graduate Courses	1 semester as TA as a graduate student.	-2
