# Supplementary material for: A survey-based analysis of the academic job market
Source: eLife. 2020 Jun 12;9:e54097. doi: 10.7554/eLife.54097 (PMC7360372; doi:10.7554/eLife.54097)
Supplement: Supplementary file 29. — Overview of candidates who commented on their view in general of the application process. Responses to “Do you have any comments that you would like to share? For example, how did you experience the application process?” Survey participants were able to provide a long answer to this comment question. A word cloud referring to this table of comments is provided in Figure 8C. Percentages are calculated out of the total number of respondents to this particular survey question. [file elife-54097-supp29.xlsx]

## Sheet: Sheet1
Table S29. Frequency of Job Applicant comments who received an offer
Type of Candidates	Percentage of Candidates	Nature of the Comments
All Candidates	100%	-
	(317 out of 317)
Candidates with at least one offer	58.3%	-
	(185 out of 317)
Candidates with at least one offer who wrote a comment about the application process	9.2%	-
	(17 out of 185)
Candidates with offers who wrote a comment and had positive perception of the application process	Less than 1.8%	e.g. Fine, Smooth
	(2 out of 17)
Candidates with offers who who wrote a comment and had negative perception of the application process	88.2%	e.g. Terrible, Stressful
	(15 out of 17)
Candidates with offers who had positive perception of the application process	1.1%	-
	(2 out of 185)
Candidates with offers who had negative perception of the application process	8.1%	-
	(15 out of 185)
Candidates with offers who made no comments	61.1%	-
	(113 out of 185)
Candidates with or without offers who made no comments	63.4%	-
	(201 out of 317)
