# Supplementary material for: A survey-based analysis of the academic job market
Source: eLife. 2020 Jun 12;9:e54097. doi: 10.7554/eLife.54097 (PMC7360372; doi:10.7554/eLife.54097)
Supplement: Supplementary file 30. — Overview of number of times job candidate survey respondents applied for a faculty (PI) position (Box 1). This is in response to the survey question:”How many times have you applied for PI positions? i.e. if the 2018–2019 cycle was the first time, please enter "1", if you also applied last cycle, enter "2", etc. Percentages are calculated out of the total number of respondents to this particular survey question (n = 314). [file elife-54097-supp30.xlsx]

## Sheet: Sheet1
Table S30. Applicant Demographics: Number of times (cycles/years) that the candidates had applied for faculty positions
Theme	Applicant number
Total Number of Applicants	100% (317 out of 317)
Applied 0 cycles	Less than 1% (1 out of 314)
Applied 1 cycle only	56.7% (176 out of 314)
Applied for 2 cycles so far	29.3% (92 out of 314)
Applied for 3 cycles so far	10.5% (33 out of 314)
Applied for 4 cycles so far	3.2% (10 out of 314)
Applied for 5 cycles	Less than 1% (2 out of 314)
Did not respond to this survey Question	Less than 1% (3 out of 317)
