# Supplementary material for: A survey-based analysis of the academic job market
Source: eLife. 2020 Jun 12;9:e54097. doi: 10.7554/eLife.54097 (PMC7360372; doi:10.7554/eLife.54097)
Supplement: Supplementary file 31. — Overview of candidates who commented on their view in general of the application process. Responses to “Do you have any comments that you would like to share? For example, how did you experience the application process?” Survey participants were able to provide long answers to this comment question. A word cloud referring to this table of comments is provided in Figure 8C. [file elife-54097-supp31.xlsx]

## Sheet: Sheet1
Table S31. Themes from Applicant survey written responses to what general perception of the application process was
Theme	Survey Responses	Frequency of the response n
Lack of Feedback	Very little feedback about why my application was unsuccessful. We never get feedback on our application material, so it is very hard to understand how to improve.	-13
Lack of Mentorship	I didn't really have a mentorship on how to handle the on-site interview and structure my proposed work talk.	-1
Biased	I feel that the process is very biased and racist.	-1
Unhealthy	I thought the application process was incredibly stressful to the point of it being unhealthy.	-1
Despair	I found the process very frustrating.	-1
Time-Consuming	Ultimately, the process did take an enormous amount of time and effort and caused me a great deal of anxiety.	-2
Lack of a single centralized system	I would love to have a single centralized system, where you upload a single application and choose a (limited) number of schools to apply to. It was also painful because many schools use different application portals with different requirements.	-2
Difficult	My health has significantly deteriorated from this process.	-3
Awful	The process was awful.	-1
Futile	The application process was an awful exercise in futility.	-2
System not working	It makes you feel like the system is not working, that something has to change.	-1
Tough	The process is tough.	-1
Painful	It was also painful because many schools use different application portals with different requirements.	-3
Stressful	It is a ridiculously stressful process. I never realized that so many people have similar anxieties, insecurities, and questions as me.	-4
Depressing	I found the process very depressing.	-1
Arduous	The application process was hard.	-1
Demoralizing	I really enjoyed the one interview that I had but otherwise I found the process fairly demoralizing.	-1
Terrible	The whole process is terrible.	-2
	The Skype interviews are terrible.
Demeaning	The Skype interviews are demeaning, and the poor connections involved seem designed to make understanding difficult. I had one Skype interview in which the point was for the selection committee to get to laugh at me and ridicule my work.	-1
Isolating	Applying for a faculty job is a very isolating process, only a few postdocs that I personally knew were sailing in the same boat.	-1
Frustrating	It was a little frustrating to not receive rejection letters from the majority of institutions.	(1)
	- I was really frustrated when I didn’t hear from a place after I did an in-person interview for 2 &1/2 months
Unpredictable	I found it very unpredictable whether the institutes were interested in my profile or not. Also the application procedures varied a lot, in terms of the number of rounds, time frame and information updates.	-1
Information-Sparse	Most places do not indicate how many pages they want each of the documents they are requesting.	-2
Non-ordinary requests	Some schools made it particularly difficult by having non-ordinary requests, such as personal statements, 5 reference letters (instead of 3), 3 separate research proposals etc.	-1
Black-box	The community of other postdocs on the market helping each other deal with questions and anxieties really helped to demystify the black box that is the faculty search.	-1
Burden-on-research	The application process was extremely time-consuming during my postdoctoral research.	-1
