# Supplementary material for: A survey-based analysis of the academic job market
Source: eLife. 2020 Jun 12;9:e54097. doi: 10.7554/eLife.54097 (PMC7360372; doi:10.7554/eLife.54097)
Supplement: Supplementary file 32. — Overview of search committee members who commented on “Do you have any other comments or thoughts about the state of hiring for tenure track positions?” Survey participants were able to provide a long answer to this comment question. [file elife-54097-supp32.xlsx]

## Sheet: Sheet1
Table S32. Themes from search committee written responses to any other comments or thoughts about the state of hiring for tenure track positions?
Theme	Survey Responses	Frequency of the response n
Extending a faculty job offer is not trivial.	If you took the probability of an offer and applied it blindly to the number of applicants, you would conclude that it is nearly hopeless to apply. The reality is that a small number of folks end up with multiple offers. So it is either more or less hopeless, depending on whether you're one of that small number. In my experience, it is easy to imagine that it's all luck or whose lab you come from…	-1
Quality of publications are most important.	The quality of the candidate's published research is the most important thing we try to evaluate.	-1
Candidate perceptions of the hiring process are unreal.	The perception gap between what trainees think matter and what actually matters is rather large due to a number of correlations. There are many problems with academic hiring processes, but they are typically not the ones trainees think they are.	-1
Too many candidates do not aim for a fit with their ability.	Too many candidates don't aim correctly for where they actually fit with their record and ability - aiming either too high or too low. We have limited slots for interviews, and often don't bring in our very top applicants since they invariably turn us down for a top 5 place.	-1
Too many candidates apply for faculty positions.	There are too many people applying for tenure track jobs. Postdocs should think more carefully about what it is they truly like about research and look for jobs that allow them to do that.	-1
Finding a fit between the candidate and the department is key.	Most find a home. Process is about connecting with a community that makes sense.	-1
Candidates apply to too many positions	Social media has amplified the crazy nature of the process. People apply to too many positions.	-1
Finding a faculty job requires persistence	It is not easy and requires persistence.	-1
Challenges in Finding a Fit	Although we have many fantastic applicants each cycle, it remains challenging to find someone who is an excellent intellectual fit for our department AND has superlative credentials.	-1
The hiring process is not as bleak as portrayed.	It's not as bleak as the scientific press or many postdocs think.	-1
