# Supplementary material for: A survey-based analysis of the academic job market
Source: eLife. 2020 Jun 12;9:e54097. doi: 10.7554/eLife.54097 (PMC7360372; doi:10.7554/eLife.54097)
Supplement: Supplementary file 33. — Overview of the search committee survey responses to “Approximately how many applicants for a posted position do you get?”, “Approximately how many applicants make it through the first round of cuts?”, “Approximately how many applicants are invited for off-site interview (Skype/phone)?”, “Approximately how many offers does your committee make per job posting?”, “Approximately how many openings has your department had in the last five years?”, “Approximately how many applicants are invited for on-site interview?”, “How long have you been involved in academic search committees?”. [file elife-54097-supp33.xlsx]

## Sheet: Sheet1
Table S33. Statistics from the Search Committee Survey
Theme	Faculty Responses (n=15)
Typical number of applications committees received each cycle	100-199 applications (n=5)
	200+applications (n=10)
Typical number of applicants making through the first round of cuts	1-19 candidates (n=5)
	20-39 candidates (n=4)
	40-50 candidates (n=3)
	60+ candidates (n=3)
Typical number of applicants invited for offsite interview (Skype/phone)	0 candidates (n=4)
	5 or fewer candidates (n=1)
	6-8 candidates (n=1)
	5-10 candidates (n=1)
	8-10 candidates (n=1)
	10 candidates (n=2)
	10-15 candidates (n=1)
	12-15 candidates (n=2)
	16 candidates (n=1)
	NA (n=1)
Typical number of applicants invited for onsite (on campus) interview	5 candidates (n=5)
	6 candidates (n=4)
	8 candidates (n=5)
	10 candidates (n=1)
Typical number of offers committees make per job posting	0-1 candidates (n=11)
	2-3 candidates (n=4)
Number of openings at your department in the last five years	2-3 openings (n=5)
	4-5 openings (n=6)
	6+ openings (n=4)
Length of faculty involvement with department’s search committee	1- 4 years (n=1)
	5-10 years (n=3)
	11-19 years (n=8)
	20-29 years (n=2)
	30+ years (n=1)
