# Supplementary material for: A survey-based analysis of the academic job market
Source: eLife. 2020 Jun 12;9:e54097. doi: 10.7554/eLife.54097 (PMC7360372; doi:10.7554/eLife.54097)
Supplement: Supplementary file 34. — Overview of the search committee faculty demographics of our faculty survey respondents. Percentages are calculated out of the total number of respondents to this particular survey question (n = 15). [file elife-54097-supp34.xlsx]

## Sheet: Sheet1
Table S34. Search Committee survey demographics
Theme: Faculty field and institution type	Faculty number
Total Number of Faculty responses received	(All faculty were based in the United States n=15)
Number of Faculty involved with search committees in the past 10 years	60% (9 out of 15)
Faculty in Engineering	6.7% (1 out of 15)
Faculty in Life Sciences	87% (13 out of 15)
Faculty in Chemistry	6.7% (1 out of 15)
Work at R1: Doctoral Universities	100% (15 out of 15)
