# Supplementary material for: A survey-based analysis of the academic job market
Source: eLife. 2020 Jun 12;9:e54097. doi: 10.7554/eLife.54097 (PMC7360372; doi:10.7554/eLife.54097)
Supplement: Supplementary file 35. — Overview of the search committee survey responses to “Does your committee look favorably upon preprints?”. [file elife-54097-supp35.xlsx]

## Sheet: Sheet1
Table S35: Statistics from the Search Committee Survey on Preprints
Theme	Depends on the faculty member. Some love preprints, others do not.	Yes (preprints are appreciated and considered a demonstration of productivity)	No (preprints are largely ignored)	We have not searched in the last 2 years	Appreciated and used but not as heavily weighted as peer-reviewed published work.
Does your committee look favorably upon preprints? (n=15)	0.066	0.667	0.133	0.066	0.066
	(1 out of 15)	(10 out of 15)	(2 out of 15)	(1 out of 15)	(1 out of 15)
