# Supplementary material for: A survey-based analysis of the academic job market
Source: eLife. 2020 Jun 12;9:e54097. doi: 10.7554/eLife.54097 (PMC7360372; doi:10.7554/eLife.54097)
Supplement: Supplementary file 36. — Overview of the search committee survey responses to “What is your perception of the job market for tenure track faculty as someone involved in the search process (please tick all that are true)”. Percentages are calculated out of the total number of respondents to this particular survey questions (Rockey, 2012). [file elife-54097-supp36.xlsx]

## Sheet: Sheet1
Table S36. Statistics from the Search Committee Survey on Perception of the job market
Theme	Faculty perception of the job market for tenure-track faculty as someone involved in the search process (please tick all that are true) (n=15)
Candidates fall below expectations during interviews	66.7% (10 out of 15)
Too few good applicants	13.3% (2 out of 15)
Hard to identify good candidates from applications	13.3% (2 out of 15)
Easy to identify good candidates from applications	73.3% (11 out of 15)
Too many good applicants	66.7% (10 out of 15)
Candidates surpass expectations during interviews	626.6% (4 out of 15)
Skype interviews have helped reduce mismatch	6.6% (1 out of 15)
The Market has changed alot since I applied for a faculty position	20% (3 out of 15)
