# Supplementary material for: A survey-based analysis of the academic job market
Source: eLife. 2020 Jun 12;9:e54097. doi: 10.7554/eLife.54097 (PMC7360372; doi:10.7554/eLife.54097)
Supplement: Supplementary file 37. — Overview of the search committee survey responses to evaluation of a number of the tenure-track application materials: 1) “To what extent does the research proposal weigh on the selection process (e.g. "This candidate's research statement is incredibly compelling!", 2) “To what extent does good mentorship in the candidate's postdoctoral/graduate student lab explicitly weigh on selection process (e.g. "This candidate's mentor is known to produce good trainees", 3) “How heavily does the committee weigh graduate student fellowships or awards (e.g. The National Science Foundation (NSF) Graduate Research Fellowship (GRF), The National Institutes of Health (NIH) predoctoral fellowship/The Ruth L. Kirschstein National Research Service Awards for Individual Predoctoral Fellowships (F30 or F31), etc.)”, 4) “How heavily does the committee weigh non-transitional postdoctoral fellowships or awards (e.g. NIH F32, AHA etc.)”, 5) “Does your committee weigh Cell, Science, or Nature papers above papers in other journals?”, 6) “To what extent does journal impact factor explicitly weigh in to the selection process (e.g. does the word ‘impact factor’ come up in discussions around applicants)?”, 7)”How heavily does the committee weigh transition awards as a positive factor (i.e. The NIH Pathway to Independence (K99/R00) award, Burroughs Wellcome Career Award, or another award that provides the applicant with money as a new faculty member)?”, 8)”How heavily does the committee weigh prior teaching experience?”. In the survey, a 5-level Likert scale was used to record faculty impressions where a response of 1 = not at all and 5 = heavily. Percentages are calculated out of the total number of respondents to this particular survey question (n = 15). [file elife-54097-supp37.xlsx]

## Sheet: Sheet1
Table S37. Statistics from the Search Committee Survey on weighting of applicant materials
Theme	Faculty evaluation (on a scale of 1-5) of the various tenure track application materials (total committee members n=15)
Weight of prior teaching experience	0% (0 out of 15) said 5
	0% (0 out of 15) said 4
	20% (3 out of 15) said 3
	53.3% (8 out of 15) said 2
	26.7% (4 out of 15) said 1
Weight of good mentorship in the candidate's postdoctoral/graduate student lab explicitly on selection process	6.7% (1 out of 15) said 5
(e.g. "This candidate's mentor is known to produce good trainees")	20% (3 out of 15) said 4
	26.7% (4 out of 15) said 3
	40% (6 out of 15) said 2
	6.7% (1 out of 15) said 1
Weight of the research proposal weigh on the selection process	60% (9 out of 15) said 5
(e.g. "This candidate's research statement is incredibly compelling!")	33.3% (5 out of 15) said 4
	0% (0 out of 15) said 3
	6.7% (1 out of 15) said 2
	0% (0 out of 15) said 1
Weight of the graduate student fellowships or awards (e.g. NSF GRF, NIH F30, etc.)	6.7% (1 out of 15) said 5
	20% (3 out of 15) said 4
	33.3% (5 out of 15) said 3
	33.3% (5 out of 15) said 2
	6.7% (1 out of 15) said 1
Weight of the non-transitional postdoctoral fellowships or awards	20% (3 out of 15) said 5
(e.g. NIH F32, AHA etc.)	33.3% (5 out of 15) said 4
	33.3% (5 out of 15) said 3
	13.3% (2 out of 15) said 2
	0% (0 out of 15) said 1
Weight of the transition awards as a positive factor (i.e. K99/R00 award, Burroughs Wellcome Career Award, or another award that provides the applicant with money as a new faculty member)	33.3% (5 out of 15) said 5
	20% (3 out of 15) said 4
	33.3% (5 out of 15) said 3
	13.3% (2 out of 15) said 2
	0% (0 out of 15) said 1
Weight of the Cell, Science, or Nature papers above papers in other journals	0% (0 out of 15) said 5
	26.7% (4 out of 15) said 4
	13.3% (2 out of 15) said 3
	26.7% (4 out of 15) said 2
	33.3% (5 out of 15) said 1
Weight of the journal impact factor explicitly in to the selection process (e.g. does the word ‘impact factor’ come up in discussions around applicants)	0% (0 out of 15) said 5
	13.3% (2 out of 15) said 4
	6.7% (1 out of 15) said 3
	26.7% (4 out of 15) said 2
	53.3% (8 out of 15) said 1
