# Supplementary material for: A survey-based analysis of the academic job market
Source: eLife. 2020 Jun 12;9:e54097. doi: 10.7554/eLife.54097 (PMC7360372; doi:10.7554/eLife.54097)
Supplement: Supplementary file 38. — Overview of the search committee who responded to “What information do you wish more candidates knew when they submitted their application?” Survey participants were able to provide a long answer to this comment question. A word cloud referring to this table of comments is provided in Figure 10A. [file elife-54097-supp38.xlsx]

## Sheet: Sheet1
Table S38. Themes from the Search Committee Survey written responses to: What information do you wish more candidates knew when they submit their application?
Theme	Survey Responses	Frequency of the response
Importance of Research Proposal	In a useful sense, no one cares about your particular interests in the way that you do. Write your application to engage a broad group of scientists. We care about the impact of what you propose to do (research blurb).	-5
Importance of publications	That your research and your papers are the main thing we look at, and we actually do read and evaluate your work. Where it's published (bioRxiv vs. CNS) does not matter. We're looking for leading indicators of success, not lagging ones.	-2
Importance of the Chalk-Talk	We care about whether you can tell us how and why this matters (chalk talk).	-3
Importance of the Impact of your work	We care about the impact of what you have done	-2
Importance of being a great & creative colleague	I wish candidates better understood that we are looking for an interesting colleague.	-3
Importance of being independent	Evidence for independence, innovative and creative research plans are good.	-1
Importance of being authentic	Making authentic personal connections when interviewing is always crucial.	-1
