# Supplementary material for: A survey-based analysis of the academic job market
Source: eLife. 2020 Jun 12;9:e54097. doi: 10.7554/eLife.54097 (PMC7360372; doi:10.7554/eLife.54097)
Supplement: Supplementary file 39. — Overview of search committee faculty members who commented on “Have you noticed any changes in the search process since the first search you were involved in?” Survey participants were able to provide a long answer to this question. A word cloud referring to this table of comments is provided in Figure 10B. [file elife-54097-supp39.xlsx]

## Sheet: Sheet1
Table S39. Themes from the Search Committee write in responses to any changes in the search process since the first search you were involved in?
Theme	Survey Responses	Frequency of the response n
No Change	Not much/Nothing fundamental	-3
Has changed	Yes	-2
	There is a lot more negative publicity and discussion.	-1
Negative publicity
Higher credentials required	The credentials required to pass the first cut are getting higher and higher.	-1
Stronger Candidates	The candidates are stronger/more savvy now	-2
Addition of online interviews	The Skype/Zoom off-site interview component is new compared to six years ago when I interviewed.	-3
Recommendation Letters	Letters have become more hyperbolic	-1
Chalk-Talks	The chalk talk is a bigger deal now	-2
