# Supplementary material for: A survey-based analysis of the academic job market
Source: eLife. 2020 Jun 12;9:e54097. doi: 10.7554/eLife.54097 (PMC7360372; doi:10.7554/eLife.54097)
Supplement: Supplementary file 40. — Mean and median values for publication-related metrics plotted in Figure 2B broken down by gender and offer status. Additionally, p-values from Wilcoxon rank-sum tests that compare metric values from the female and male groups. “All” shows these values when the full dataset is considered, “With offers” shows values for only those applicants with at least one offer, and “Without offers” shows values for only those without any offers. “F” stands for female and “M” stands for male. Trends in gender differences remain the same even for the applicants with offers, serving as a possible explanation for the similar search outcomes for females and males and the importance of gender in the logistic regression. [file elife-54097-supp40.xlsx]

## Sheet: Sheet1
Table S40. Job Applicant survey scholarly metrics by gender with breakdown by offer status
Variable	All (Fig. 2B)					With offers					Without offers
	Mean		Median		p-value	Mean		Median		p-value	Mean		Median		p-value
	F	M	F	M		F	M	F	M		F	M	F	M
Number of first-author publications	6.1	7.8	5	7	1.42 x 10-4	6	8.6	5	7	1.92 x 10-5	6.4	6.8	5	7	0.409
Total number of publications	13.5	16.4	11	14	2.79 x 10-3	13.5	17.5	11	16	2.68 x 10-4	13.4	14.9	11	12	0.57
Citations	397	455.3	228	343	1.50 x 10-2	453	522	251	403	3.18 x 10-2	315.4	358.4	216.5	265	0.233
h-index	7.9	9	7	9	5.42 x 10-3	8.1	9.9	7	10	9.42 x 10-4	7.7	7.8	7	8	0.777
