# Supplementary figures and images for: A survey-based analysis of the academic job market
Source: eLife journal article supplement (doi:10.7554/elife.54097), 2020-06-12

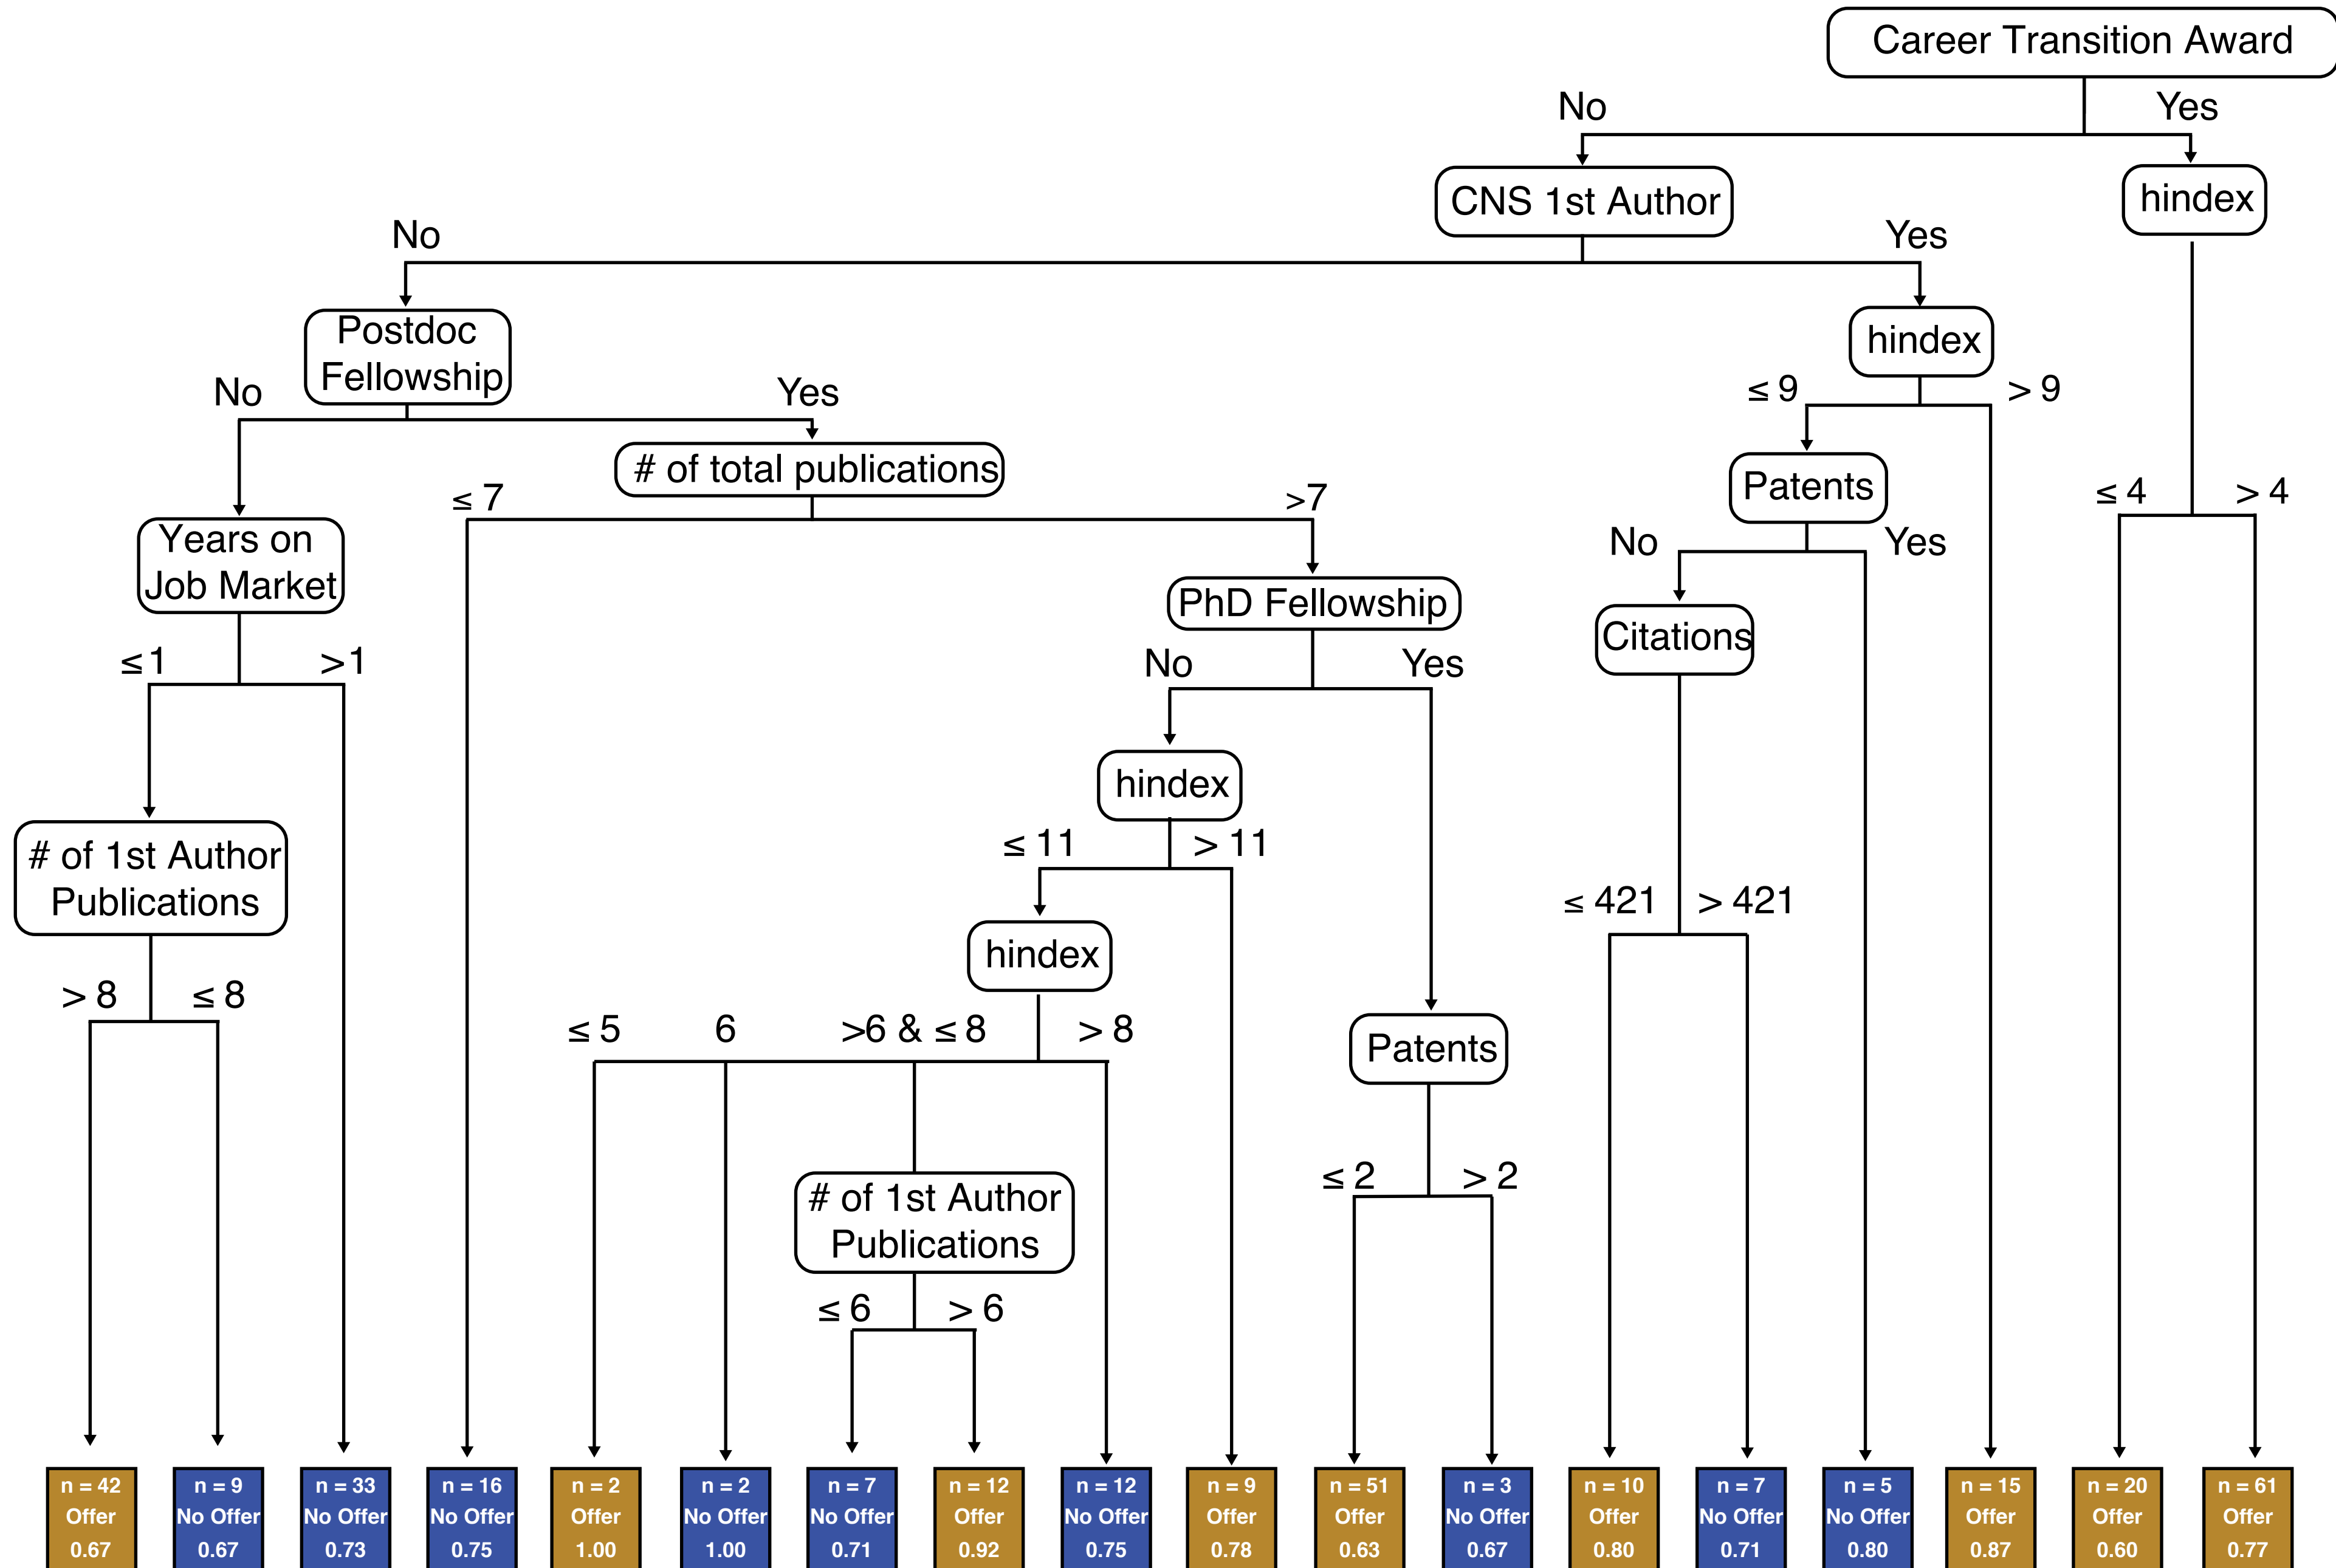

Supplement: supp [file elife-54097-supp-v1.zip]

## Impressions of Candidates

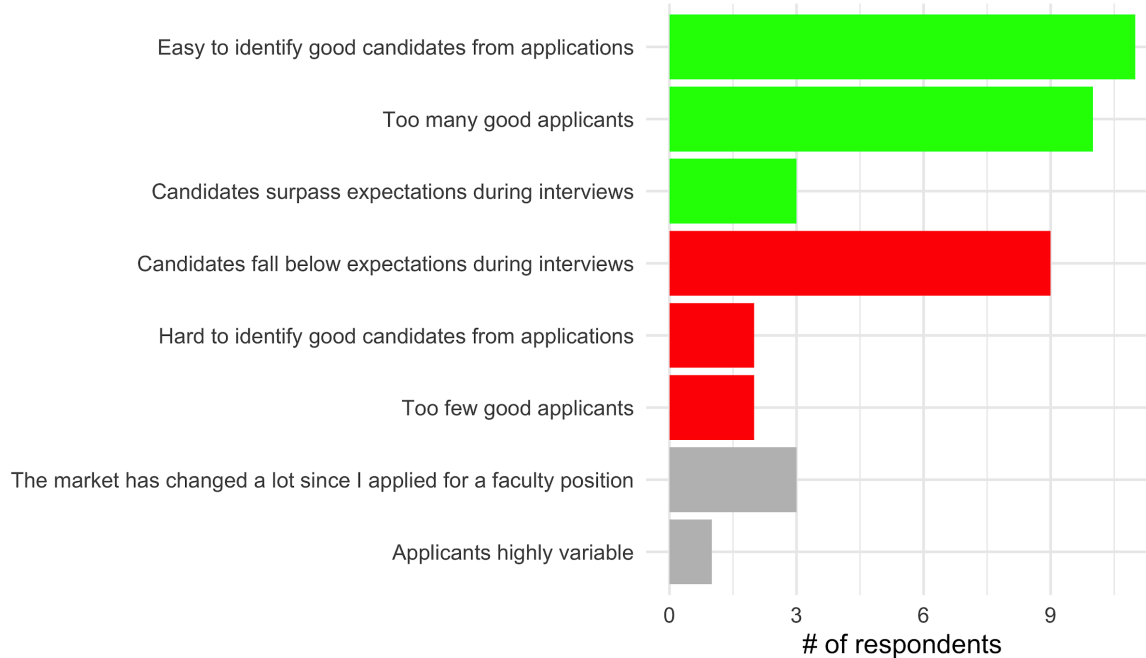

Supplement: supp [file elife-54097-supp-v1.zip]

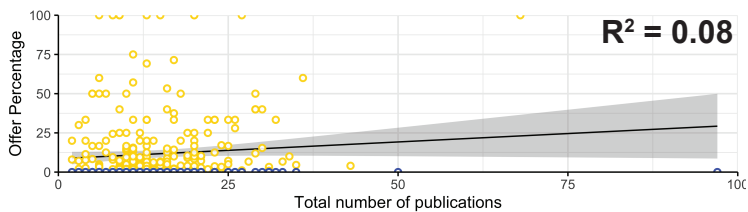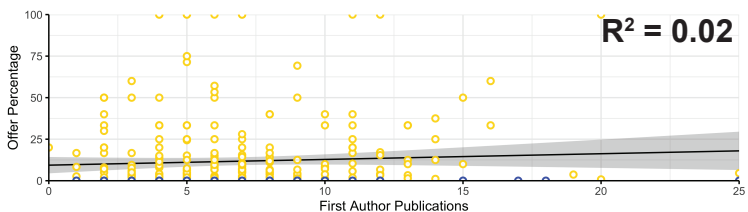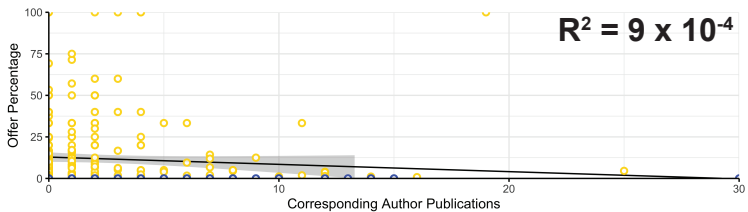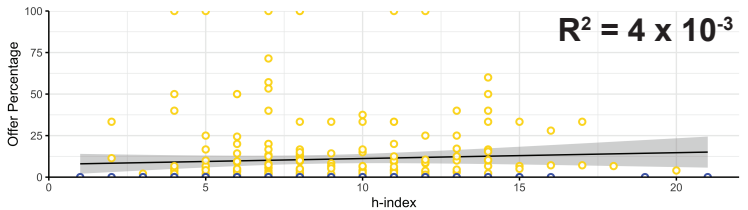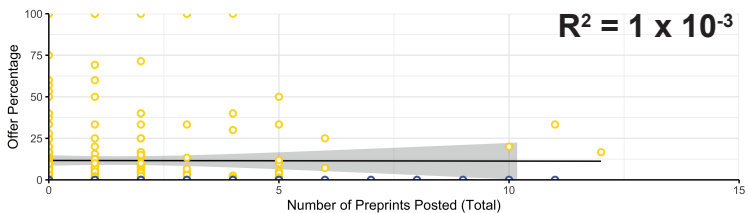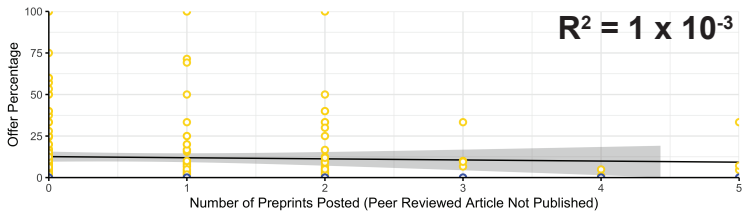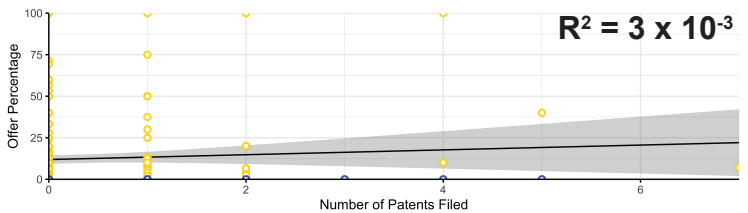

Supplement: supp [file elife-54097-supp-v1.zip]
